# Supplementary material for: The core root microbiome of Spartina alterniflora is predominated by sulfur-oxidizing and sulfate-reducing bacteria in Georgia salt marshes, USA
Source: PubMed Central journal article supplement (PMC8886783; doi:10.1186/s40168-021-01187-7), 2022-03-01

## Supplemental information

**Table S2:** Allometric equations used to estimate *S. alterniflora* biomass by plant phenotype according to Wieski and Pennings (2014)

| <i>S. alterniflora</i> phenotype | Equation                                                    |
|----------------------------------|-------------------------------------------------------------|
| Tall                             | $\ln(\text{biomass}) = -6.095 + 1.760 * \ln(\text{height})$ |
| Medium and short                 | $\ln(\text{biomass}) = -6.934 + 1.973 * \ln(\text{height})$ |

Biomass: Shoot dry mass (g)

Height: Shoot height (cm)

**Table S3:** Extracellular enzyme substrates employed in the study identified by Chemical Abstracts Service (CAS) and Enzyme Commission (EC) designations.

| Exoenzyme                                        | Substrate name                                          | CAS number | EC number         |
|--------------------------------------------------|---------------------------------------------------------|------------|-------------------|
| $\beta$ -Glucosidase                             | 4-Methylumbelliferyl $\beta$ -D-glucopyranoside         | 18997-57-4 | 3.2.1.21          |
| $\beta$ -1,4-N-acetylglucosaminidase (chitinase) | 4-Methylumbelliferyl N-acetyl- $\beta$ -D-glucosaminide | 37067-30-4 | 3.2.1.14          |
| Phosphatase                                      | 4-Methylumbelliferyl phosphate                          | 3368-04-5  | 3.1.3.2 / 3.1.3.1 |

**Table S4:** PCR amplification conditions employed in the study.

| Reaction            | Primer set                | Initial Denaturat. | Denaturat. | PNAs annealing | Primers annealing | Extension | Final extension |
|---------------------|---------------------------|--------------------|------------|----------------|-------------------|-----------|-----------------|
| 1 <sup>st</sup> PCR | 515F/806R <sup>1</sup>    | 2m, 95°C           | 94°C, 45s  | 78°C, 10s      | 50°C, 60s         | 72°C, 60s | 10m, 72°C       |
|                     |                           |                    |            | x28            |                   |           |                 |
| 2 <sup>nd</sup> PCR | Fluidigm 10-base barcodes | 5m, 95°C           | 94°C, 30s  | -              | 60°C, 30s         | 72°C, 30s | 5m, 72°C        |
|                     |                           |                    |            | x8             |                   |           |                 |
| qPCR                | 515F/806R <sup>1</sup>    | 2m, 95°C           | 94°C, 45s  | 78°C, 10s      | 50°C, 60s         | 72°C, 90s | -               |
|                     |                           |                    |            | x40            |                   |           |                 |

<sup>1</sup>Caporaso et al. (2011)

**Fig. S1.** Satellite images of study areas: (a) Sapelo Island GCE-6 site, and (b) Skidaway Island SERF site.

Sapelo Island, GCE-6 site

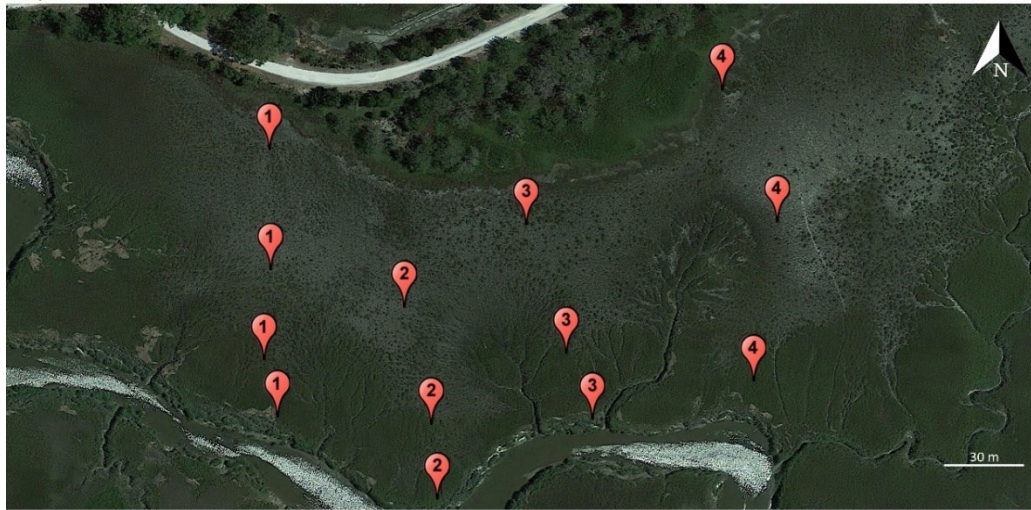

Skidaway Island, SERF site

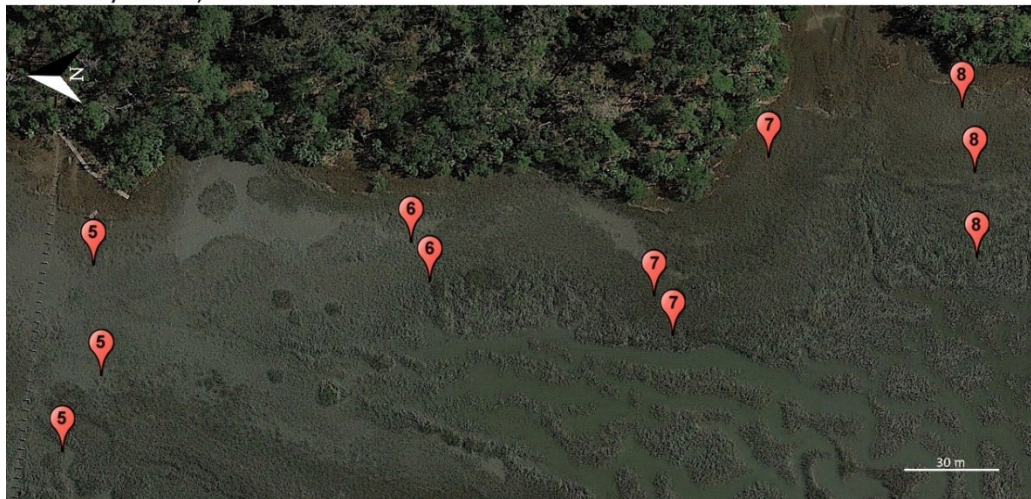

**Fig. S2.** Site ecological characterization. Boxplots of leaf N concentration, density of crab burrows, marsh periwinkle snail density, sediment redox potential (E<sub>h</sub>), sediment pH, and porewater salinity grouped by *S. alterniflora* phenotype.

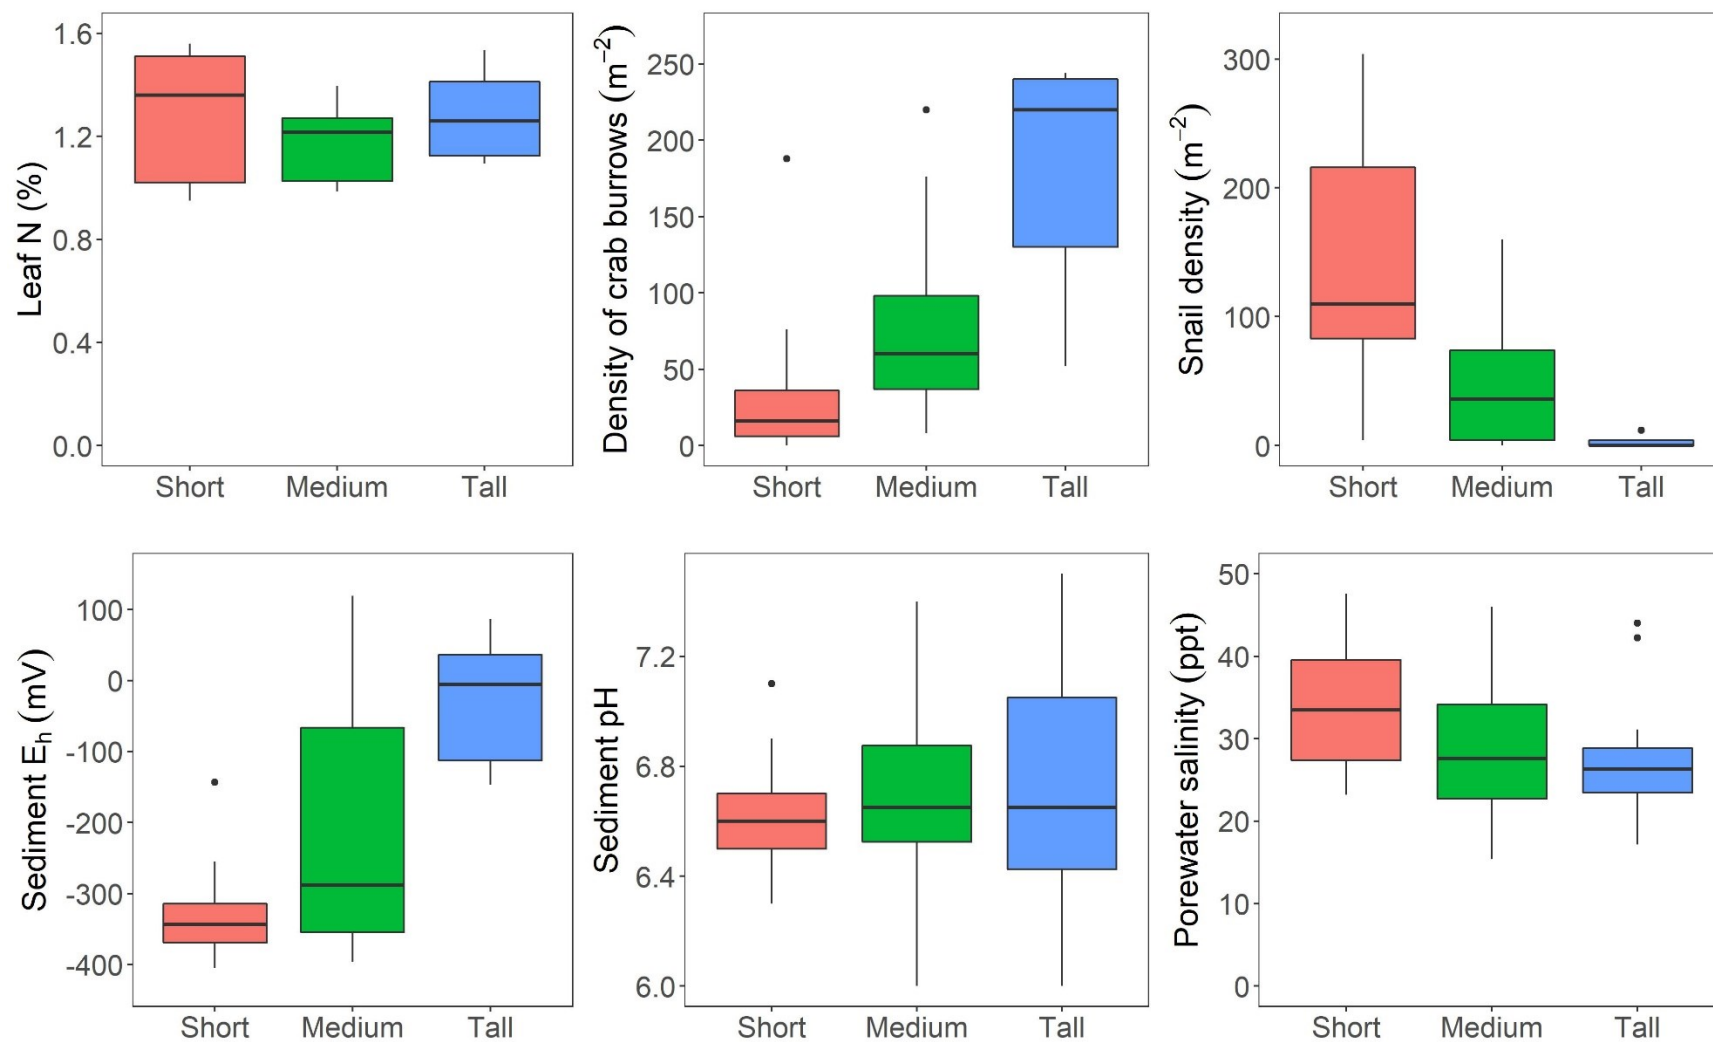

**Fig. S3.** Porewater chemistry characterization by *S. alterniflora* phenotype. Boxplots of ammonium, nitrate, phosphate, total sulfides, Fe(II), and Fe(III) porewater concentration per *S. alterniflora* phenotype.

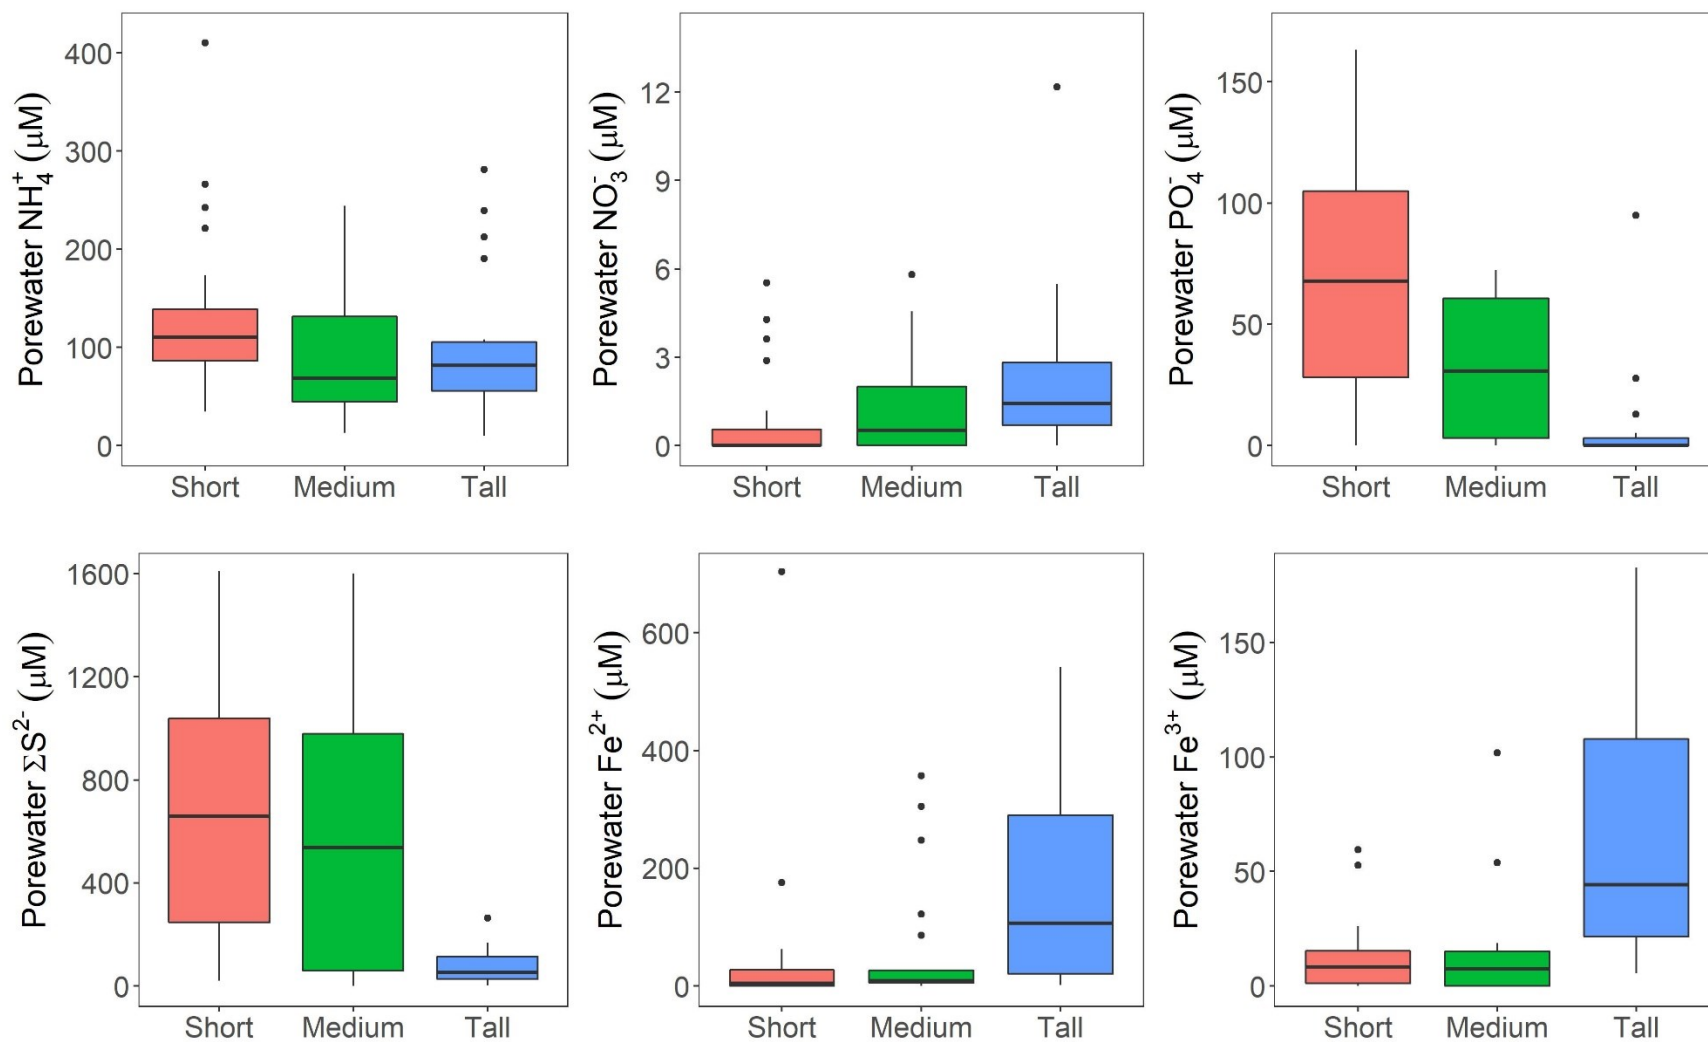

**Fig. S4.** C and N isotopic natural abundance by *S. alterniflora* phenotype. Boxplots of leaf  $\delta^{15}\text{N}$ , sediment  $\delta^{15}\text{N}$ , difference between leaf and sediment  $\delta^{15}\text{N}$  ( $\Delta^{15}\text{N}$ ), leaf  $\delta^{13}\text{C}$ , sediment  $\delta^{13}\text{C}$ , and difference between leaf and sediment  $\delta^{13}\text{C}$  ( $\Delta^{13}\text{C}$ ).

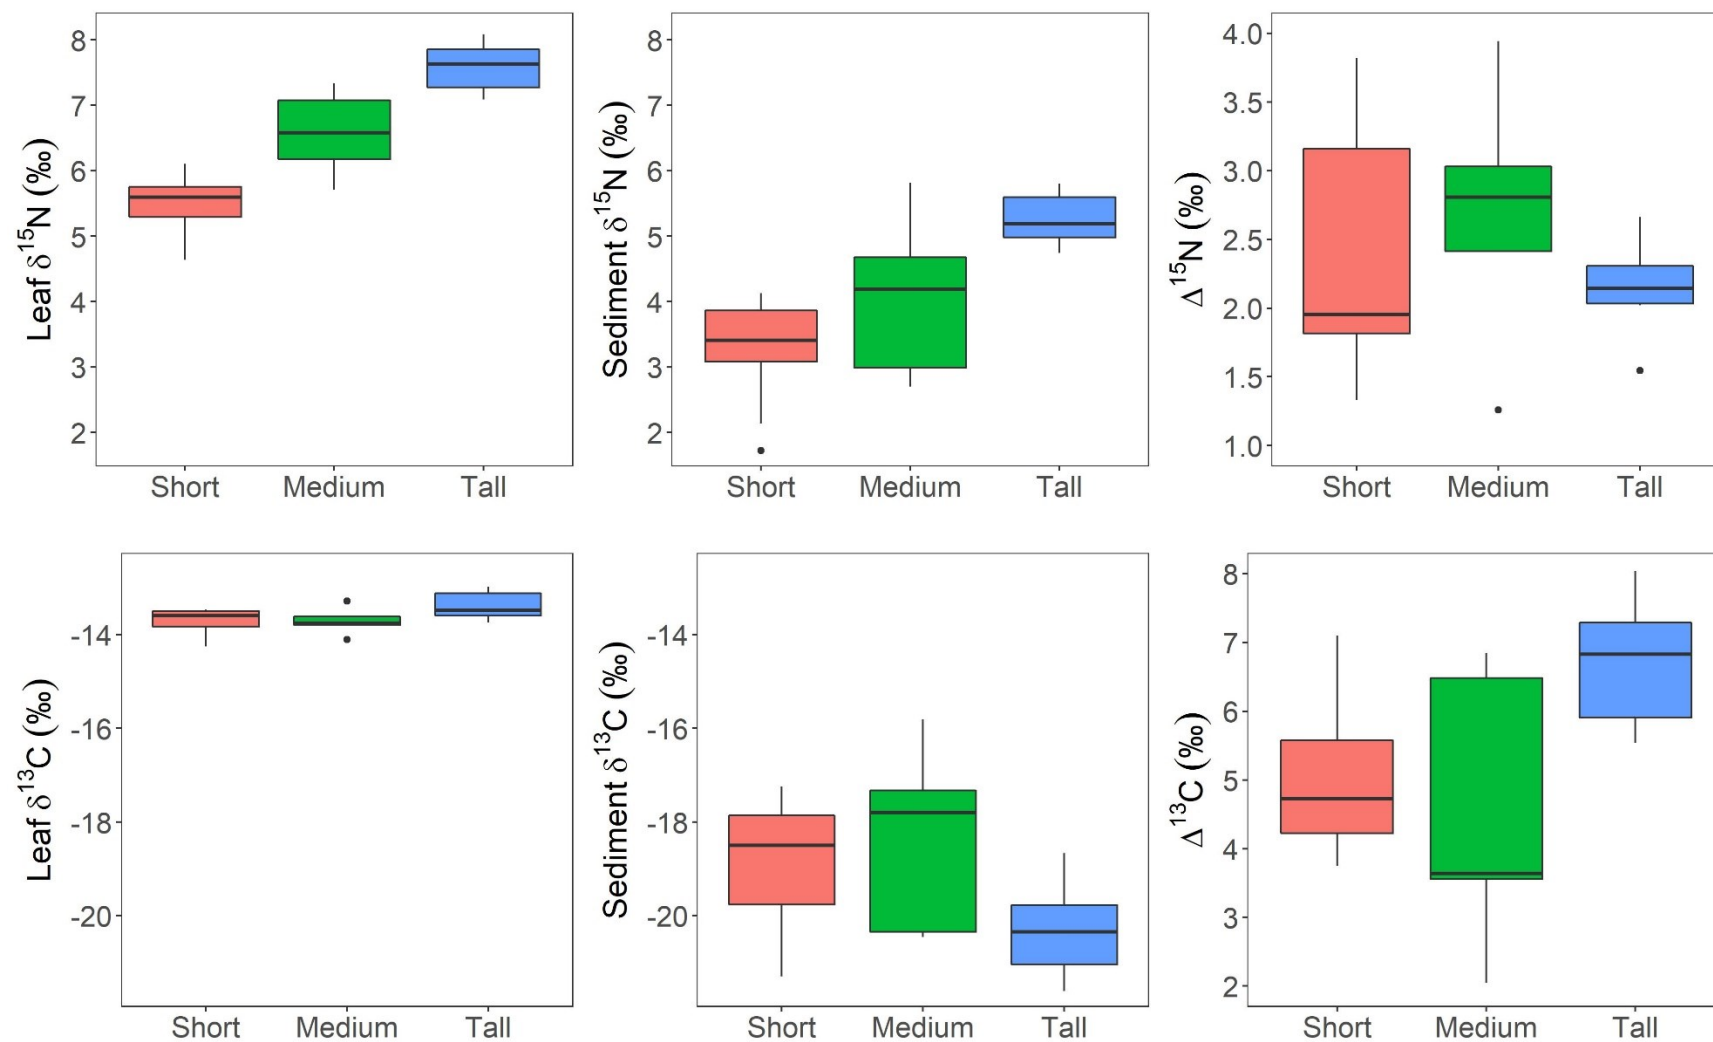

**Fig. S5.** Nearest taxon index (NTI) (a), and  $\beta$ -nearest taxon index ( $\beta$ NTI) (b) density plots per microbiome compartment. Dashed lines in -2 and, 2, represents interpretation thresholds. Continuous line represents median value according to index and microbiome compartment.

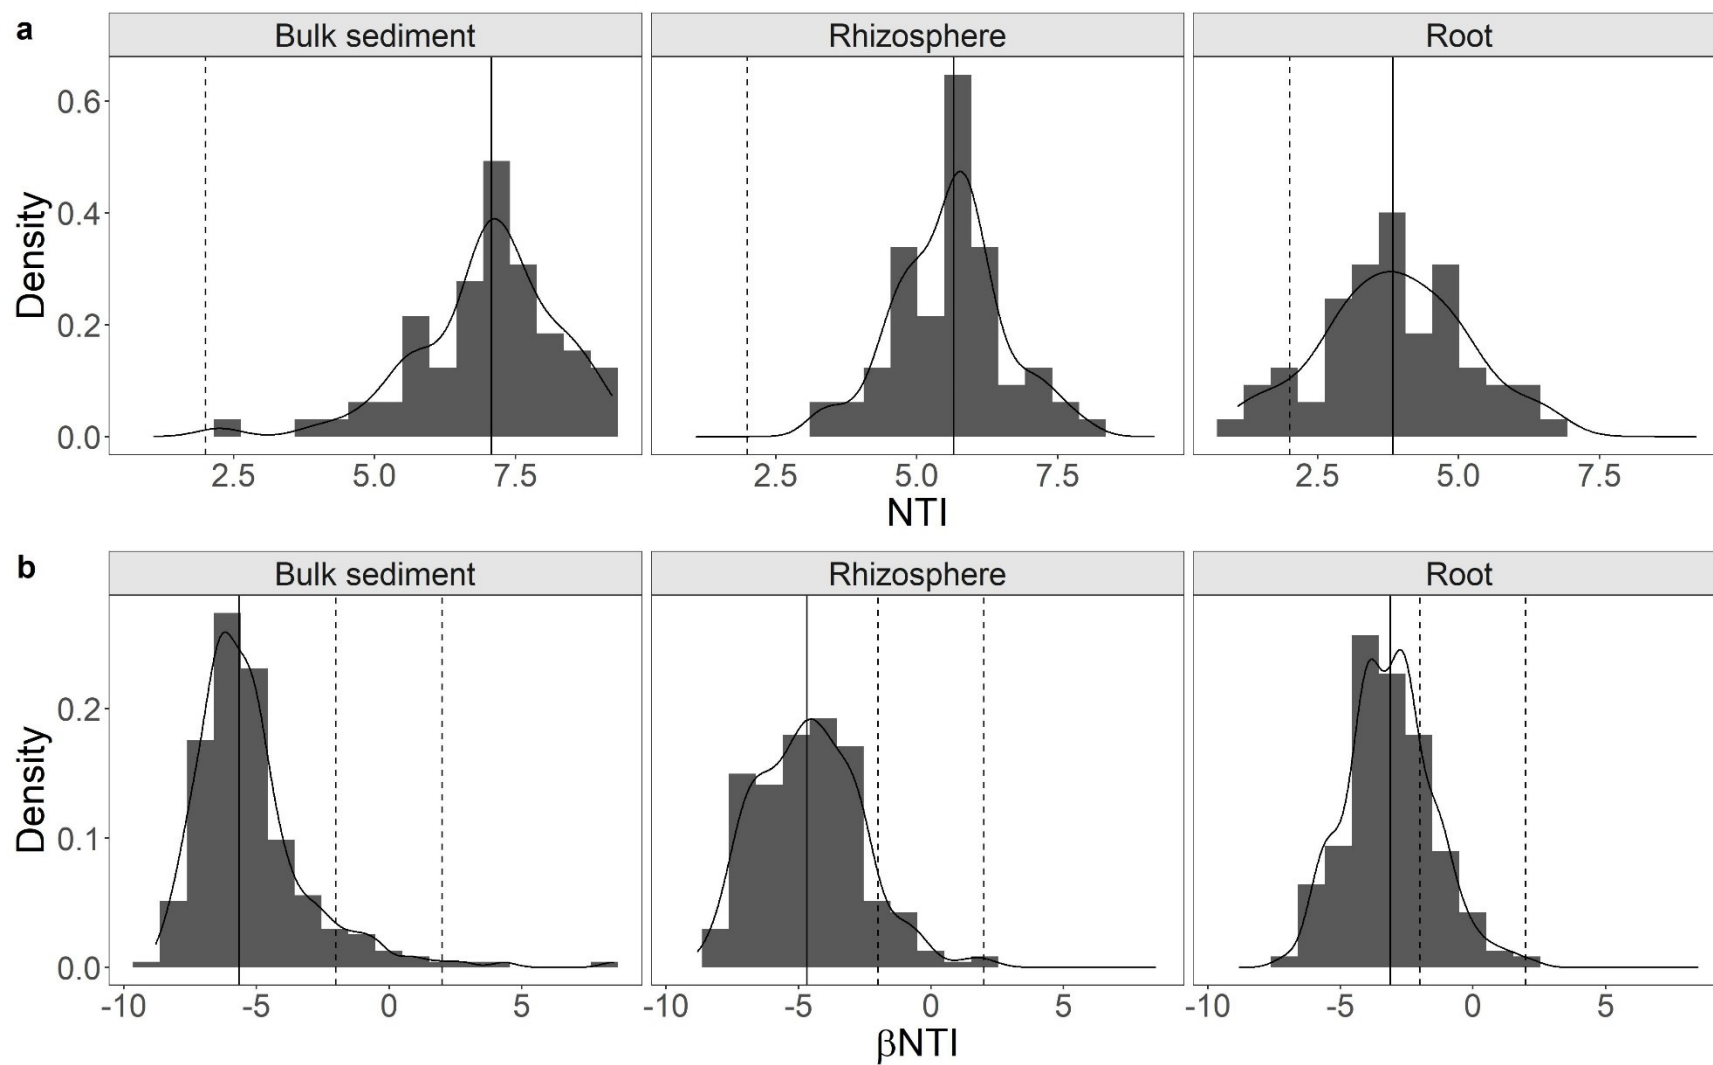

**Fig. S6.** Prokaryotic relative abundance partitioned at the phylum level according to microbiome compartment and *S. alterniflora* phenotype.

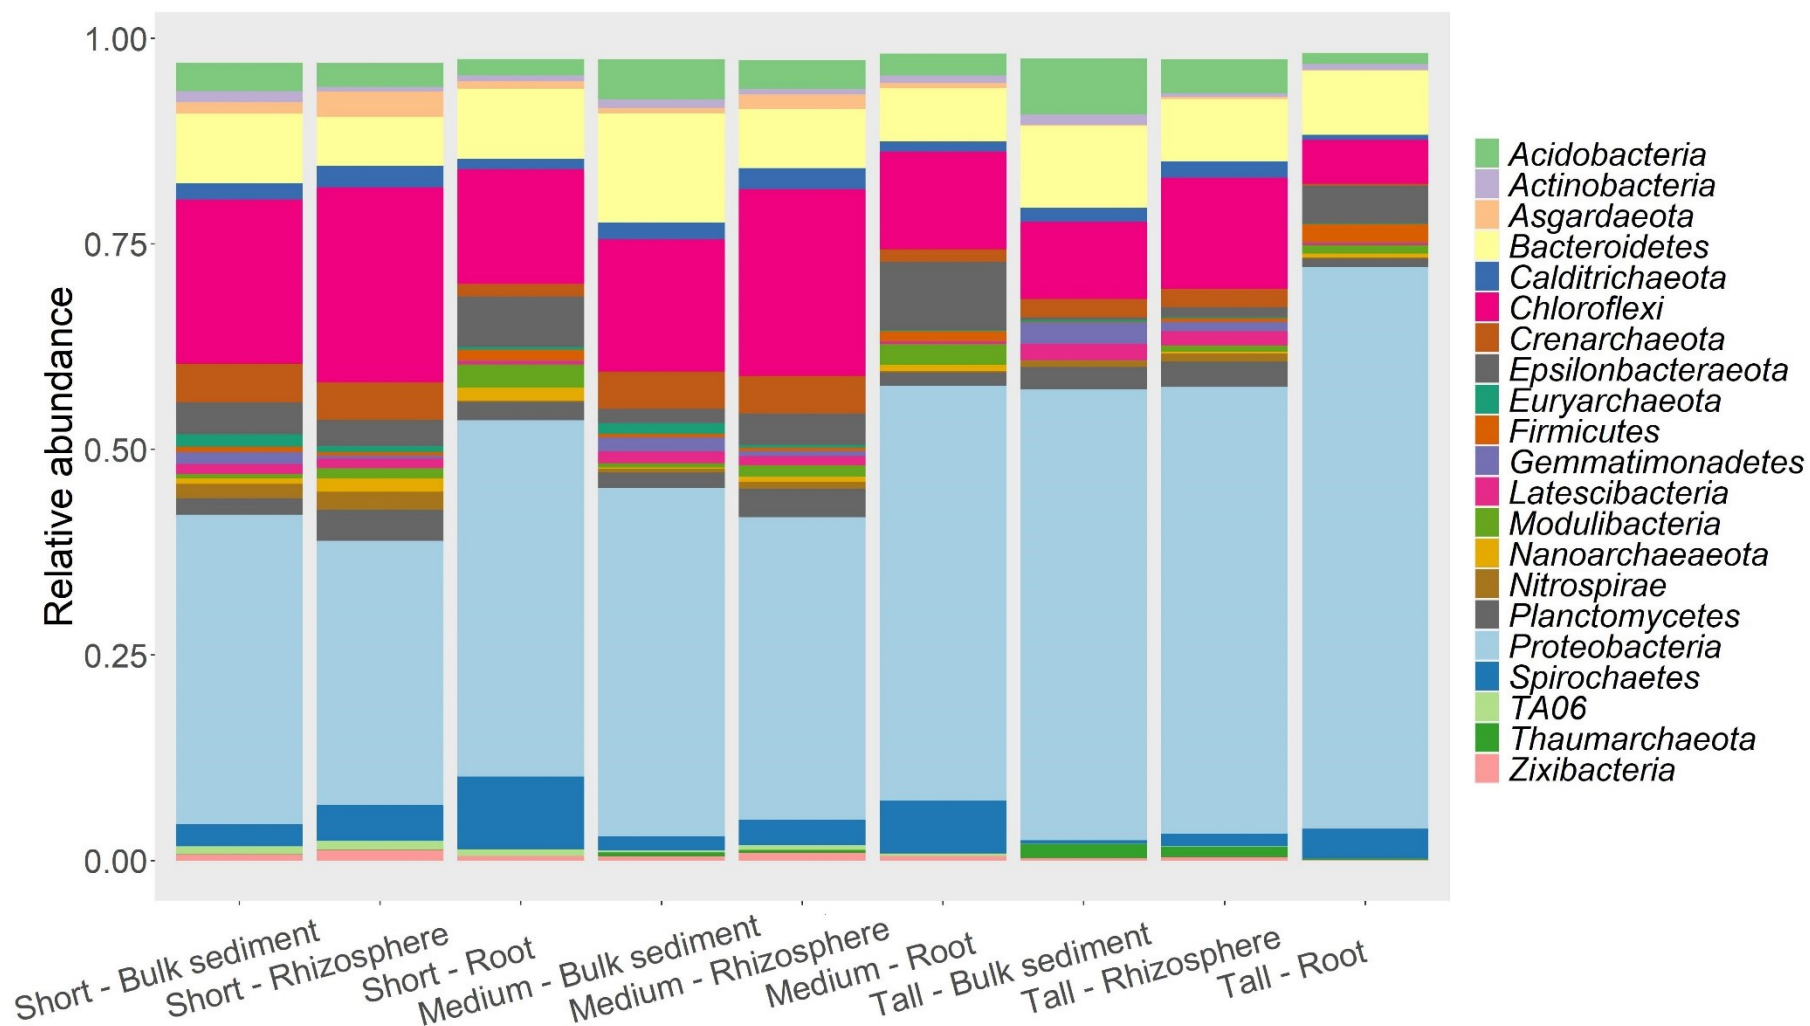

**Fig. S7.** Prokaryotic genera significantly enriched in the root in comparison to the bulk sediment compartments (a), and tall compared to short *S. alterniflora* phenotype (b) as assessed by DESeq2. Values represent the following: Yellow: Aerobic/facultative-anaerobic chemoheterotrophy, Green: N fixation, White: C fixation, Red: Nitrification, Blue: S oxidation, Black: S reduction, Brown: Methylytrophy, Purple: Metal reduction

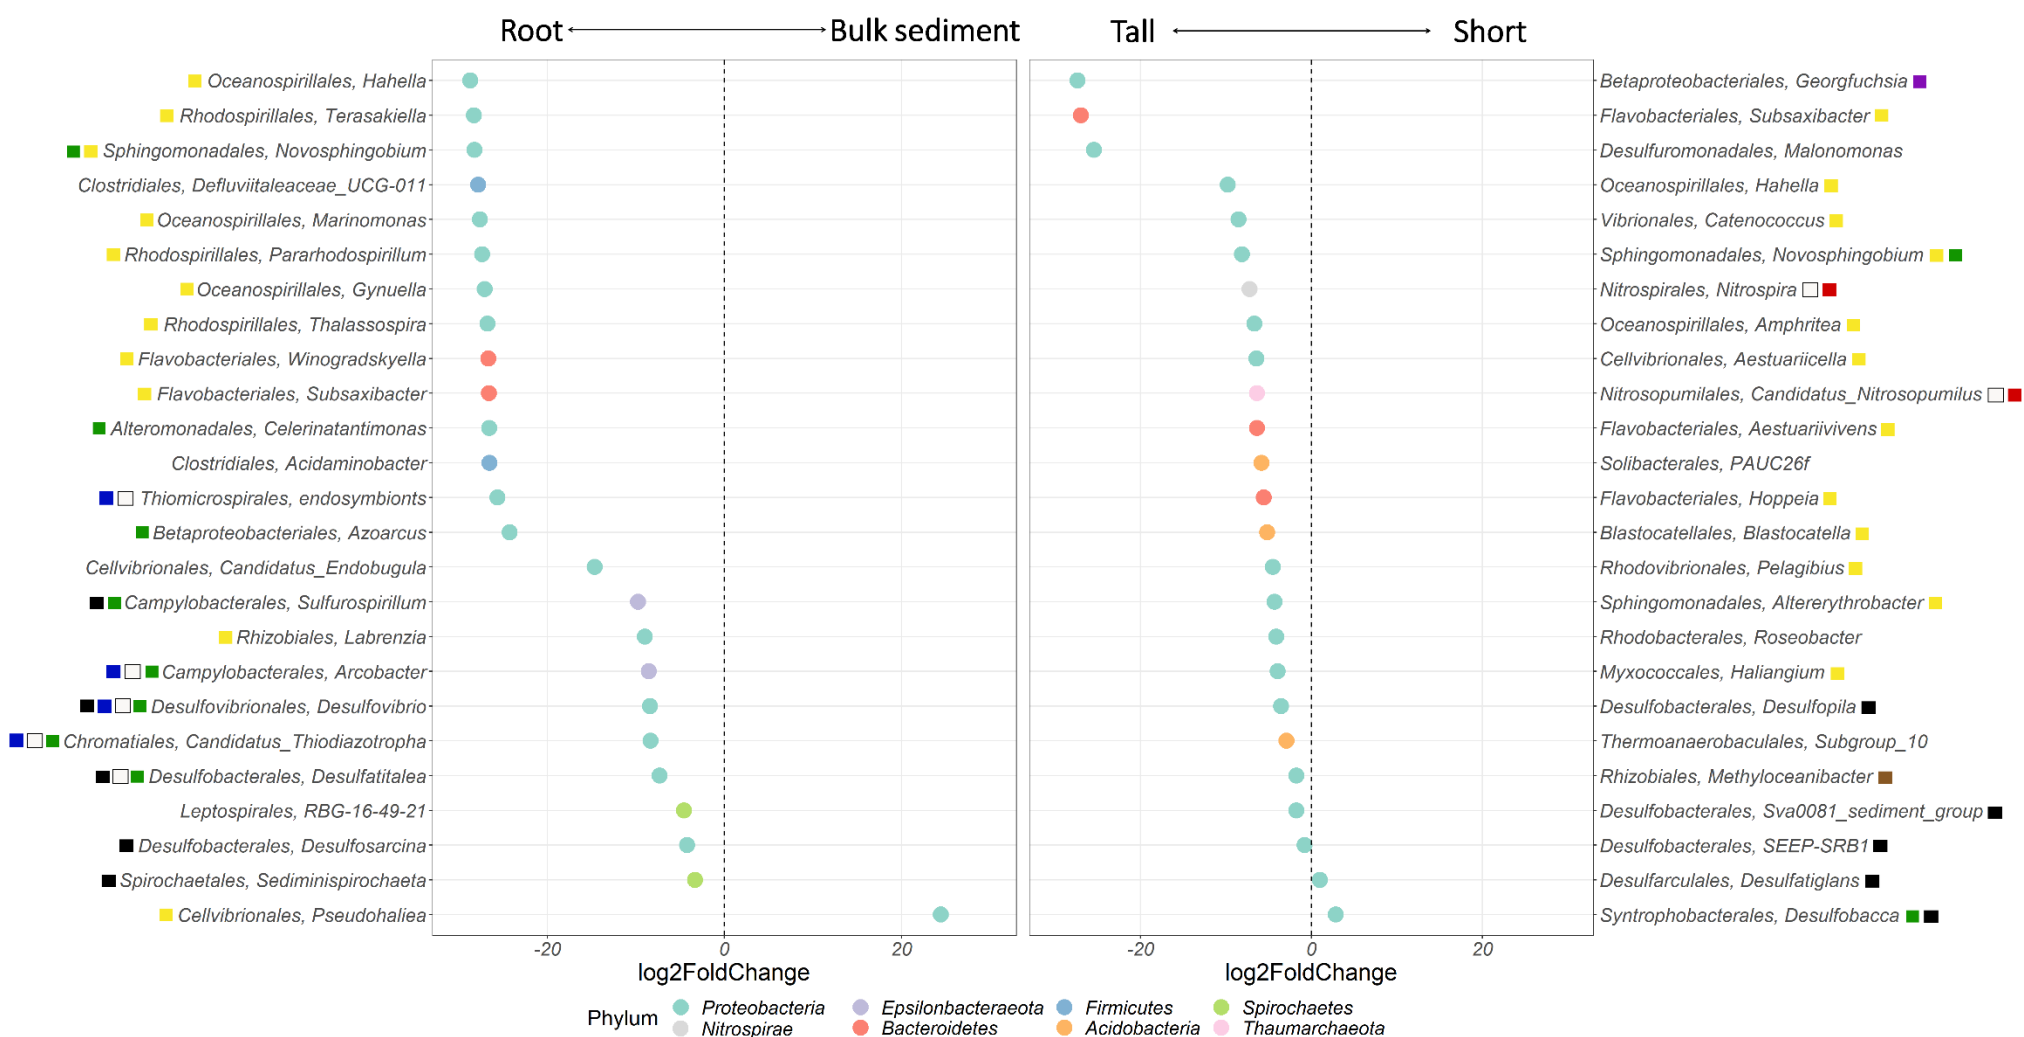



**Fig. S8.** Analysis of the core microbiome by accumulated richness and relative abundance with species prevalence cutoff thresholds at 10% intervals from 0% to 100% ASVs prevalence cutoffs.

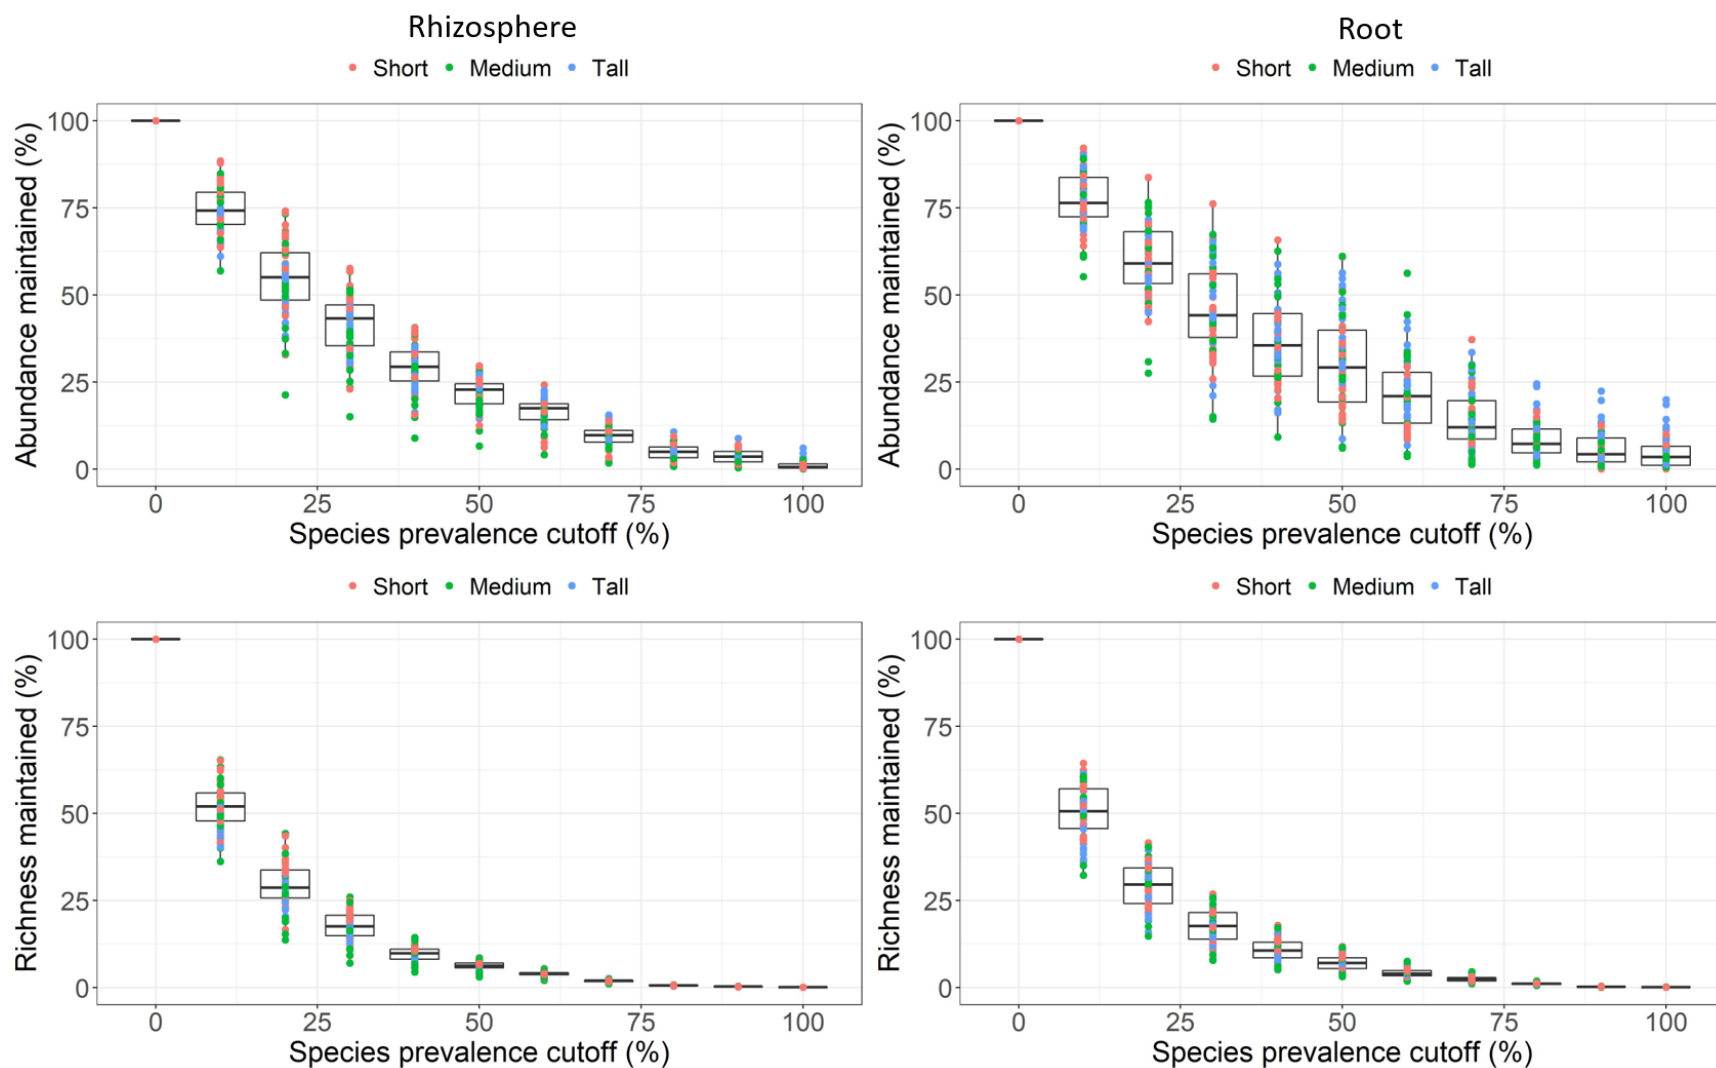

Supplement: 40168_2021_1187_MOESM3_ESM.pdf [file 40168_2021_1187_MOESM3_ESM.pdf]
